# Supplementary material for: Multiple Primary Melanoma Incidence Trends Over Five Decades: A Nationwide Population-Based Study
Source: PubMed Central journal article supplement — J Natl Cancer Inst. 2020 Jun 24;113(3):318–28. doi: 10.1093/jnci/djaa088 (PMC7936055; doi:10.1093/jnci/djaa088), 2020-06-24
Supplement: djaa088_supplementary_data.pdf [file djaa088_supplementary_data.pdf]

Supplementary Table 1. Patients with in situ melanoma as first tumor and invasive melanoma as the second tumor, and vice versa

|                                       | 1960s          | 1970s          | 1980s          | 1990s          | 2000s*         | P value, 2000s decade vs. ‡ |        |        |        |
|---------------------------------------|----------------|----------------|----------------|----------------|----------------|-----------------------------|--------|--------|--------|
|                                       |                |                |                |                |                | 1960s                       | 1970s  | 1980s  | 1990s  |
| Women with invasive as first melanoma |                |                |                |                |                |                             |        |        |        |
| In situ as second melanoma, n (%)     | 0 (0.0%)       | 12 (0.3%)      | 64 (1.1%)      | 113 (1.5%)     | 117 (2.6%)     |                             |        |        |        |
| Incidence (95% CI)†                   | 0.0 (0.0-0.3)  | 0.4 (0.2-0.8)  | 1.4 (1.1-1.8)§ | 1.8 (1.5-2.2)§ | 3.2 (2.6-3.8)§ | 0.002                       | <0.001 | <0.001 | <0.001 |
| Women with in situ as first melanoma  |                |                |                |                |                |                             |        |        |        |
| Invasive as second melanoma, n (%)    | 1 (1.6%)       | 4 (1.7%)       | 36 (3.1%)      | 78 (3.0%)      | 68 (3.8%)      |                             |        |        |        |
| Incidence (95% CI)                    | 1.6 (0.0-9.0)  | 1.8 (0.5-4.7)  | 3.4 (2.4-4.7)  | 3.3 (2.6-4.1)  | 4.2 (3.3-5.4)  | 0.3389                      | 0.108  | 0.306  | 0.117  |
| Men with invasive as first melanoma   |                |                |                |                |                |                             |        |        |        |
| In situ as second melanoma, n (%)     | 1 (0.0%)       | 3 (0.1%)       | 44 (0.8%)      | 123 (1.7%)     | 137 (3.2%)     |                             |        |        |        |
| Incidence (95% CI)                    | 0.1 (0.0-0.6)  | 0.2 (0.0-0.4)  | 1.2 (0.9-1.6)  | 2.3 (1.9-2.7)§ | 4.2 (3.5-5.0)§ | <0.001                      | <0.001 | <0.001 | <0.001 |
| Men with in situ as first melanoma    |                |                |                |                |                |                             |        |        |        |
| Invasive as second melanoma, n (%)    | 1 (3.3%)       | 7 (4.4%)       | 36 (4.4%)      | 69 (3.5%)      | 61 (4.6%)      |                             |        |        |        |
| Incidence (95% CI)                    | 4.0 (0.1-22.2) | 5.1 (2.1-10.5) | 5.2 (3.6-7.2)  | 4.1 (3.2-5.2)  | 5.3 (4.1-6.8)  | 0.287                       | 0.918  | 0.915  | 0.135  |

\*First primary melanomas diagnosed in 2000-2004

†Incidence (95% confidence interval) of a second primary melanoma per 1,000 person-years after the diagnosis of a first melanoma

‡P value for the rate ratio of the incidence rate in the 2000s decade compared to the incidence in the 1990s, 1980s, 1970s and 1960s.

§Incidence rate was significantly higher in this decade ( $P<0.05$ ) than in the closest preceding decade.
